# Supplementary material for: Patients with Rare Cancers in the Drug Rediscovery Protocol (DRUP) Benefit from Genomics-Guided Treatment
Source: PubMed Central journal article supplement — Clin Cancer Res. 2022 Jan 18;28(7):1402–11. doi: 10.1158/1078-0432.CCR-21-3752 (PMC9365364; doi:10.1158/1078-0432.ccr-21-3752), 2022-01-18
Supplement: ccr-21-3752_supplemental_table_1_supps1.pdf [file ccr-21-3752_supplemental_table_1_supps1.pdf]

Supplemental Table 1 – Drugs, molecular targets and enrolled cancer types

| Drug                                         | Molecular targets allowed                                                                                                                                       | Cancer types enrolled (n)  |                                        |                              |                            |                      |
|----------------------------------------------|-----------------------------------------------------------------------------------------------------------------------------------------------------------------|----------------------------|----------------------------------------|------------------------------|----------------------------|----------------------|
| <b>Afatinib</b><br>(Boehringer-Ingelheim)    | Activating mutation or fusion of <i>NRG1</i>                                                                                                                    | NSCLC (1)                  |                                        |                              |                            |                      |
|                                              | Activating mutations of <i>ERBB4</i>                                                                                                                            |                            |                                        |                              |                            |                      |
| <b>Axitinib</b><br>(Pfizer)                  | Activating mutations or amplifications of <i>KDR (VEGFR2)</i> or <i>FLT4 (VEGFR3)</i>                                                                           | CRC (1)                    |                                        |                              |                            |                      |
| <b>Cabozantinib</b><br>(Ipsen)               | Activating mutations or amplifications of <i>MET, NTRK1/2</i>                                                                                                   | Esophageal cancer (1)      | NSCLC (1)                              |                              |                            |                      |
|                                              | Activating mutation or fusion of <i>RET</i>                                                                                                                     | Melanoma (1)               | Teratoma (1)                           |                              |                            |                      |
| <b>Crizotinib</b><br>(Pfizer)                | Activating mutation, fusion or amplification of <i>ALK</i>                                                                                                      | Bile duct cancer (1)       | Inflammatory myofibroblastic tumor (3) |                              |                            |                      |
|                                              | Activating mutation or amplification of <i>MET</i>                                                                                                              | CRC (2)                    | NSCLC (17)                             |                              |                            |                      |
|                                              | Fusion of <i>ROS1</i>                                                                                                                                           | Esophageal cancer (1)      | Thyroid cancer (1)                     |                              |                            |                      |
| <b>Dabrafenib + Trametinib</b><br>(Novartis) | Activating <i>BRAF V600D/E/K/R</i> mutations                                                                                                                    | GBM (3)                    | Low grade glioma (1)                   | Neuroendocrine carcinoma (1) | NSCLC (1)                  |                      |
| <b>Dabrafenib monotherapy</b><br>(Novartis)  | Activating <i>BRAF V600D/E/K/R</i> mutations                                                                                                                    | GBM (2)                    | UCC (1)                                |                              |                            |                      |
| <b>Durvalumab</b><br>(AstraZeneca)           | MSI tumors                                                                                                                                                      | Bile duct cancer (3)       | CRC (9)                                | GBM (1)                      | Prostate cancer (1)        | Stomach cancer (3)   |
|                                              |                                                                                                                                                                 | Breast cancer (2)          | Endometrial cancer (1)                 | NEC (1)                      | Small intestine cancer (2) |                      |
| <b>Erlotinib</b><br>(Roche)                  | Activating mutation of <i>EGFR</i>                                                                                                                              | GBM (1)                    |                                        |                              |                            |                      |
| <b>Lenvatinib</b><br>(Eisai)                 | Activating mutations, fusions or amplification of <i>FGFR1/2/3/4</i>                                                                                            | ACC (1)                    | Breast cancer (6)                      | Endometrial cancer (2)       | Sarcoma (1)                | Urachal cancer (1)   |
|                                              |                                                                                                                                                                 | Anal cancer (1)            | CRC (2)                                | Esophageal cancer (1)        | Salivary gland cancer (1)  |                      |
|                                              |                                                                                                                                                                 | Bile duct cancer (2)       | CUP (1)                                | NSCLC (7)                    | UCC (2)                    |                      |
| <b>Nilotinib</b><br>(Novartis)               | Activating mutations or amplifications of <i>KIT, PDGFRA</i> or <i>PDGFRB</i>                                                                                   | CRC (1)                    | Melanoma (2)                           |                              |                            |                      |
|                                              | Activating mutation of <i>ABL1</i>                                                                                                                              | GIST (11)                  | Mesothelioma (1)                       |                              |                            |                      |
| <b>Nivolumab</b><br>(BMS)                    | MSI or HML > 450 tumors                                                                                                                                         | Atypical fibroxanthoma (1) | CRC (25)                               | Duodenal cancer (2)          | NET (2)                    | cSCC (2)             |
|                                              |                                                                                                                                                                 | BCC (2)                    | Cervical cancer (1)                    | Endometrial cancer (5)       | Prostate cancer (7)        | UCC (3)              |
|                                              |                                                                                                                                                                 | Breast cancer (5)          | CUP (2)                                | GBM (1)                      | RCC (1)                    |                      |
| <b>Nivolumab + ipilimumab</b><br>(BMS)       | HML tumors                                                                                                                                                      | CRC (1)                    |                                        |                              |                            |                      |
| <b>Olaparib</b><br>(AstraZeneca)             | Inactivating mutations or deletions of <i>ATM, BARD1, BRCA1/2, BRIP1, CDK12, CHEK1/2, FANCL, PALB2, PPP2R2A, RAD50, RAD51B, RAD51C, RAD51D</i> or <i>RAD54L</i> | ACC (2)                    | Breast cancer (5)                      | NSCLC (2)                    | RCC (1)                    |                      |
|                                              |                                                                                                                                                                 | Adrenal cancer (1)         | Carcinosaroma (1)                      | Ovarian cancer (3)           | Small intestine cancer (1) |                      |
|                                              |                                                                                                                                                                 | Appendix cancer (1)        | CRC (7)                                | Pancreatic cancer (3)        | UCC (2)                    |                      |
|                                              |                                                                                                                                                                 | Bile duct cancer (2)       | Endometrial cancer (2)                 | Prostate cancer (27)         | Urachal cancer (1)         |                      |
| <b>Palbociclib</b><br>(Pfizer)               | Amplifications of <i>CCND1, CCND2, CDK4, CDK6, PIK3R4</i> or <i>GSK3b</i>                                                                                       | Bile duct cancer (4)       | Esophageal cancer (3)                  | NET (1)                      | Pancreatic cancer (1)      | Sarcoma (1)          |
|                                              | Activating mutations of <i>CDK4 R24</i> or <i>FLT3</i>                                                                                                          | CRC (2)                    | GBM (9)                                | NSCLC (5)                    | PEComa (1)                 | (Uveal) melanoma (6) |
|                                              | Inactivating mutations or deletions of <i>CDKN2A</i> or <i>SMARCA4</i>                                                                                          | Duodenal cancer (1)        | HNSCC (1)                              | Ovarian cancer (1)           | RCC (1)                    |                      |
| <b>Panitumumab</b><br>(Amgen)                | No mutations of <i>KRAS, BRAF</i> or <i>NRAS</i>                                                                                                                | Anal cancer (2)            | Endometrial (2)                        | Meningioma (2)               | Sarcoma (4)                | Vulvar cancer (3)    |
|                                              |                                                                                                                                                                 | Cervical cancer (5)        | GBM (4)                                | NSCLC (4)                    | Thyroid cancer (1)         |                      |
|                                              |                                                                                                                                                                 | CUP (1)                    | HNSCC (2)                              | Salivary gland cancer (1)    | Uveal melanoma (3)         |                      |

|                                             |                                                                                                                                                                                                                                                                                   |                           |                        |                            |                     |                            |
|---------------------------------------------|-----------------------------------------------------------------------------------------------------------------------------------------------------------------------------------------------------------------------------------------------------------------------------------|---------------------------|------------------------|----------------------------|---------------------|----------------------------|
| <b>Pembrolizumab</b><br>(MSD)               | HML > 140                                                                                                                                                                                                                                                                         | Anal cancer (1)           | Breast cancer (20)     | Endometrial cancer (2)     | HNSCC (3)           | SCLC (6)                   |
|                                             |                                                                                                                                                                                                                                                                                   | BCC (1)                   | Cervical cancer (3)    | Esophageal cancer (10)     | Prostate cancer (3) | Small intestine cancer (1) |
|                                             |                                                                                                                                                                                                                                                                                   | Bile duct cancer (1)      | CRC (12)               | Gastric cancer (2)         | Sarcoma (2)         | Vulvar cancer (1)          |
| <b>Regorafenib</b><br>(Bayer)               | Activating mutations or amplification of <i>FLT1 (VEGFR 1)</i> , <i>KDR (VEGFR2)</i> , <i>FLT4 (VEGFR3)</i> , <i>KIT</i> , <i>PDGFRB</i> , <i>RAF1</i> , <i>CSF1R</i> or <i>CSF1 (M-CSF)</i><br>Activating mutation or fusion of <i>RET</i><br>Activating mutation of <i>BRAF</i> | Bladder cancer (1)        | CUP (1)                | Hidradenocarcinoma (1)     | cSCC (1)            |                            |
|                                             |                                                                                                                                                                                                                                                                                   | Esthesioneuroblastoma (1) | Thymus cancer (1)      |                            |                     |                            |
|                                             |                                                                                                                                                                                                                                                                                   | Melanoma (1)              |                        |                            |                     |                            |
| <b>Ribociclib</b><br>(Novartis)             | Amplifications of <i>CCND1</i> , <i>CCND2</i> , <i>CDK4</i> or <i>CDK6</i><br>Inactivating mutation or deletion of <i>CDKN2A</i>                                                                                                                                                  | Ependymoma (1)            |                        |                            |                     |                            |
|                                             |                                                                                                                                                                                                                                                                                   | Melanoma (1)              |                        |                            |                     |                            |
| <b>Rucaparib</b><br>(Clovis Oncology)       | Inactivating mutations or deletions of <i>BRCA1/2</i> , <i>RAD51C</i> , <i>RAD51D</i> or <i>PALB2</i>                                                                                                                                                                             | Pancreatic cancer (1)     |                        |                            |                     |                            |
| <b>Sunitinib</b><br>(Pfizer)                | Amplification of <i>FGFR1/2/3</i><br>Activating mutations or amplifications of <i>CSF1R</i> , <i>FLT3</i> , <i>KDR (VEGFR2)</i> , <i>FLT4 (VEGFR3)</i> , <i>KIT</i> , <i>PDGFRA</i> , <i>PDGFRB</i><br>Activating mutation or fusion of <i>RET</i>                                | Breast cancer (1)         | Thymus cancer (1)      |                            |                     |                            |
|                                             |                                                                                                                                                                                                                                                                                   | Prostate cancer (1)       | UCC (1)                |                            |                     |                            |
|                                             |                                                                                                                                                                                                                                                                                   | Sarcoma (1)               |                        |                            |                     |                            |
| <b>Trametinib monotherapy</b><br>(Novartis) | Activating mutations of <i>MAP2K1</i> , <i>MAP2K2</i> , <i>MAP2K4</i> , <i>MAP3K1</i> , <i>NRAS</i>                                                                                                                                                                               | Bile duct cancer (1)      | CRC (3)                | NSCLC (8)                  | Prostate cancer (1) |                            |
|                                             |                                                                                                                                                                                                                                                                                   | Breast cancer (2)         | CUP (1)                | Ovarian cancer (2)         | Thyroid cancer (1)  |                            |
|                                             |                                                                                                                                                                                                                                                                                   | Cervical cancer (1)       | NEC (1)                | Pleiomorphic carcinoma (1) |                     |                            |
| <b>Trastuzumab + pertuzumab</b><br>(Roche)  | Activating mutation or amplification of <i>ERBB2</i>                                                                                                                                                                                                                              | ACC (1)                   | Cervical cancer (3)    | NSCLC (36)                 | UCC (7)             |                            |
|                                             |                                                                                                                                                                                                                                                                                   | Bile duct cancer (8)      | Hidradenocarcinoma (1) | Ovarian cancer (2)         | Vulvar cancer (1)   |                            |
|                                             |                                                                                                                                                                                                                                                                                   | CRC (11)                  | NEC (1)                | Salivary duct cancer (5)   |                     |                            |
| <b>Vemurafenib + cobimetinib</b><br>(Roche) | Activating <i>BRAF V600D/E/K/R</i> mutations                                                                                                                                                                                                                                      | CUP (2)                   | Ovarian cancer (2)     | Salivary duct cancer (3)   | Thyroid cancer (4)  |                            |
| <b>Vismodegib</b><br>(Roche)                | Inactivating mutation of <i>PTCH1</i>                                                                                                                                                                                                                                             | Sarcoma (1)               |                        |                            |                     |                            |

Abbreviations: MSI = microsatellite instability; HML = high mutational load (as determined by whole genome sequencing). GBM = glioblastoma; NSCLC = non-small cell lung cancer; SCLC = small cell lung cancer; UCC = urothelial cell cancer; CRC = colorectal cancer; ACC = adenoid cystic carcinoma; CUP = cancer of unknown primary; RCC = renal cell cancer; BCC = basal cell cancer; cSCC = cutaneous squamous cell carcinoma; HNSCC = head and neck squamous cell cancer
